# Supplementary material for: Differentiation of Mitragyna Speciosa, a Narcotic Plant, From Allied Mitragyna Species Using DNA&nbsp;Barcoding-high-resolution Melting (Bar-HRM) Analysis
Source: Research Square preprint supplement (doi:10.21203/rs.3.rs-109985/v1), 2020-11-25
Supplement: Supplementary file 2 [file 9257256e541a9587390640d0.docx]

| **Tittle** | **Differentiation of *Mitragyna speciosa*, a narcotic plant, from allied *Mitragyna* species using DNA barcoding-high-resolution melting (Bar-HRM) analysis** |
| --- | --- |
| Authors | Chayapol Tungphatthong1,3, Santhosh Kumar J. Urumarudappa1,3, Supita Awachai1, Thongchai Sooksawate2 and Suchada Sukrong1* |
| Affiliation | 1Research Unit of DNA Barcoding of Thai Medicinal Plants, Department of Pharmacognosy and Pharmaceutical Botany, Faculty of Pharmaceutical Sciences, Chulalongkorn University, Bangkok 10330, Thailand |
| 2Department of Pharmacology and Physiology, Faculty of Pharmaceutical Sciences, Chulalongkorn University, Bangkok 10330, Thailand |
| 3These authors contributed equally: Chayapol Tungphatthong and Santhosh Kumar J. Urumarudappa |
| *Corresponding author | Professor Suchada Sukrong, Ph**.**D**.** |
| Research Unit of DNA Barcoding of Thai Medicinal Plants, |
| Department of Pharmacognosy and Pharmaceutical Botany, |
| Faculty of Pharmaceutical Sciences, Chulalongkorn University, |
| Bangkok 10330, Thailand |
| Phone: **+**6681**-**819**-**6742, Fax: **+**6622**-**558**-**227 |
| Email: suchada**.**su@chula**.**ac**.**th |

**Table S1:** List of different DNA barcode regions and with their primer details used in this study.

| **Sl. No** | **Region with primer names** | | **Sequence (5'-3')** | **Reference** |
| --- | --- | --- | --- | --- |
| 1 | *psb*A*-trn*H | trnHF | CGC GCA TGG TGG ATT CAC AAT CC | 1 |
| psbA-diR | GTA ATG CAT GAA CGT AAT GCT C |
| 2 | *mat*K | trnK3914F | TGG GTT GCT AAC TCA ATG G | 2 |
| trnK2R | AAC TAG TCG GAT GGA GTA C |
| matKMit-56F | CTT TGG TTT GAC TAT ATC GCA CTA | 3 |
| matKMit483F | CCC ACC CCG TCC ATC TA |
| matKMit1166R | CGG CTT ACT AAC GGG ATG TC |
| 3 | ITS | 18S-25SF | GTA GGT GAA CCT GCA GAA GGA TCA | 4 |
| 18S-25SR | CCA TGC TTA AAC TCA GCG GGT |
| 4 | *rbc*L | rbcLMitF1 | TGT CAC CAC AAA CAG AAA CTA AAG CAA GT | 3 |
| rbcLMitR1 | CTT TTA GTA AAG ATT GGG CCG AG |
| rbcLMitF2 | CGA GTA GCT CTA GAA GCA TGT GTA AAA G | 3 |
| rbcLMitR2 | TTT GTA ACG ATC AAG GCT GGT AAG TAA |
| 5 | ITS2 | Mitragyna_ITS2_F | CGG CCT AAA TGC GAG TCC TC | This study |
| Mitragyna_ITS2_R | CGG CAC GAC AGA AAT CGA GTC |
| 6 | *mat*K | Mitragyna_matK_F | TGTGAATACGAATCCATTTTCGTC | This study |
| Mitragyna_matK_R | ACTCCAAAAGATGTTGATCGCA |
| 7 | *rbc*L | Mitragyna_rbcL_F | AAAGCTCGTAATGAGGGGCG | This study |
| Mitragyna_rbcL_R | ACTCCATTTACTAGCCTCACGG |
| 8 | *psbA-*trn*H* | Mitragyna_psbA_F | AGAAGAAGAAGGAAATTATTGCTCC | This study |
| Mitragyna_psbA_R | CCTAGCTGCTATAGATGCTCCA |

**Reference:**

1. Vongsak, B., Kengtong, S., Vajrodaya, S., & Sukrong, S. Sequencing analysis of the medicinal plant Stemona tuberosa and five related species existing in Thailand based on trnH-psbA chloroplast DNA. *Planta Med* 74(14), 1764-1766 (2008).
2. Johnson, L. A., & Soltis, D. E. matK DNA sequences and phylogenetic reconstruction in Saxifragaceae s. str. *Syst. Bot* 143-156 (1994).
3. Jaipaew, J., Padungchareon, T., & Sukrong, S. PCR-reverse dot blot of the nucleotide signature sequences of matK for the identification of *Mitragyna speciosa*, a narcotic species. *Plant Gene* 14, 46-54 (2018).
4. Takaiwa, F., Oono, K., & Sugiura, M. Nucleotide sequence of the 17S–25S spacer region from rice rDNA. *Plant Mol. Biol* 4(6), 355-364 (1985).
