# Supplementary material for: Differentiation of Mitragyna Speciosa, a Narcotic Plant, From Allied Mitragyna Species Using DNA&nbsp;Barcoding-high-resolution Melting (Bar-HRM) Analysis
Source: Research Square preprint supplement (doi:10.21203/rs.3.rs-109985/v1), 2020-11-25
Supplement: Supplementary file 3 [file a3370362f7d631aa2bff6cce.docx]

| **Tittle** | **Differentiation of *Mitragyna speciosa*, a narcotic plant, from allied *Mitragyna* species using DNA barcoding-high-resolution melting (Bar-HRM) analysis** |
| --- | --- |
| Authors | Chayapol Tungphatthong1,3, Santhosh Kumar J. Urumarudappa1,3, Supita Awachai1, Thongchai Sooksawate2 and Suchada Sukrong1* |
| Affiliation | 1Research Unit of DNA Barcoding of Thai Medicinal Plants, Department of Pharmacognosy and Pharmaceutical Botany, Faculty of Pharmaceutical Sciences, Chulalongkorn University, Bangkok 10330, Thailand |
| 2Department of Pharmacology and Physiology, Faculty of Pharmaceutical Sciences, Chulalongkorn University, Bangkok 10330, Thailand |
| 3These authors contributed equally: Chayapol Tungphatthong and Santhosh Kumar J. Urumarudappa |
| *Corresponding author | Professor Suchada Sukrong, Ph**.**D**.** |
| Research Unit of DNA Barcoding of Thai Medicinal Plants, |
| Department of Pharmacognosy and Pharmaceutical Botany, |
| Faculty of Pharmaceutical Sciences, Chulalongkorn University, |
| Bangkok 10330, Thailand |
| Phone: **+**6681**-**819**-**6742, Fax: **+**6622**-**558**-**227 |
| Email: suchada**.**su@chula**.**ac**.**th |

**Table S1**. List of *Mitragyna* species occurring in Thailand along with their voucher number, collection locations, and GenBank accession number (GenBank accession number adopted from our previous study Sukrong et al., 2007 and Jaipaew et al., 2018).

| **Botanical name** | **Place of collection**  **(Province)** | **Voucher no.** | **GenBank Accession** | | | |
| --- | --- | --- | --- | --- | --- | --- |
| **ITS** | ***mat*K** | ***rbc*L** | ***trn*H-*psb*A** |
| *Mitragyna speciosa*  (Roxb.) Korth. | Bangkok | TTP-051001 | AB249645 | LC334409 | LC334413 | LC334417 |
| Bangkok | NRS-090294-597 |  |  |  |  |
| Bangkok | NRS-090294-598 |  |  |  |  |
| Bangkok | MUS-5512-2 |  |  |  |  |
| Pathum Thani | MUS-5601-1 |  |  |  |  |
| Phatthalung | MUS-5601-2 |  |  |  |  |
| Satun | MUS-5601-3 |  |  |  |  |
| Bangkok | NSR-090294-602 |  |  |  |  |
| Bangkok | NSR-090294-603 |  |  |  |  |
| Bangkok | MUS-5512-3 |  |  |  |  |
| Bangkok | MUS-5601-4 |  |  |  |  |
| Pathum Thani | MUS-5602-1 |  |  |  |  |
| Pathum Thani | MUS-5602-2 |  |  |  |  |
| Chachoengsao | MUS-5603-1 |  |  |  |  |
| *Mitragyna diversifolia*  (Wall. ex G.Don) Havil. | Bangkok | NSR-090294-596 | AB249646 | LC334410 | LC334414 | LC334418 |
| Bangkok | MUS-5602-2 |  |  |  |  |
| Suphan Buri | Suchada-041101 |  |  |  |  |
| Khon Kaen | MUS-5604-1 |  |  |  |  |
| Khon Kaen | MUS-5604-2 |  |  |  |  |
| Nakhon Pathom | TTP-050901 |  |  |  |  |
| Nakhon Pathom | MUS-5603-2 |  |  |  |  |
| Nakhon Pathom | MUS-5603-3 |  |  |  |  |
| *Mitragyna hirsuta*  Havil. | Bangkok | TTP-050902 | AB249647 | LC334412 | LC334416 | LC334420 |
| Sukhothai | TTP-051103 |
| Sukhothai | MUS-5603-4 |
| Kamphaeng Phet | TTP-051104 |
| Kamphaeng Phet | MUS-5603-5 |
| Nakhon Ratchasima | MUS-5604-3 |
| *Mitragyna rotundifolia*  (Roxb.) Kuntze | Uttaradit | TTP-051105 | AB249648 | LC334411 | LC334415 | LC334419 |
| Bangkok | MUS-5601-5 |
| Nakhon Ratchasima | MUS-5604-4 |
| Nakhon Ratchasima | MUS-5604-5 |
