# Supplementary material for: Differentiation of Mitragyna Speciosa, a Narcotic Plant, From Allied Mitragyna Species Using DNA&nbsp;Barcoding-high-resolution Melting (Bar-HRM) Analysis
Source: Research Square preprint supplement (doi:10.21203/rs.3.rs-109985/v1), 2020-11-25
Supplement: Supplementary file 4 [file 7420f906c511339636b599f8.docx]

| **Tittle** | **Differentiation of *Mitragyna speciosa*, a narcotic plant, from allied *Mitragyna* species using DNA barcoding-high-resolution melting (Bar-HRM) analysis** |
| --- | --- |
| Authors | Chayapol Tungphatthong1,3, Santhosh Kumar J. Urumarudappa1,3, Supita Awachai1, Thongchai Sooksawate2 and Suchada Sukrong1* |
| Affiliation | 1Research Unit of DNA Barcoding of Thai Medicinal Plants, Department of Pharmacognosy and Pharmaceutical Botany, Faculty of Pharmaceutical Sciences, Chulalongkorn University, Bangkok 10330, Thailand |
| 2Department of Pharmacology and Physiology, Faculty of Pharmaceutical Sciences, Chulalongkorn University, Bangkok 10330, Thailand |
| 3These authors contributed equally: Chayapol Tungphatthong and Santhosh Kumar J. Urumarudappa |
| *Corresponding author | Professor Suchada Sukrong, Ph**.**D**.** |
| Research Unit of DNA Barcoding of Thai Medicinal Plants, |
| Department of Pharmacognosy and Pharmaceutical Botany, |
| Faculty of Pharmaceutical Sciences, Chulalongkorn University, |
| Bangkok 10330, Thailand |
| Phone: **+**6681**-**819**-**6742, Fax: **+**6622**-**558**-**227 |
| Email: suchada**.**su@chula**.**ac**.**th |

**Table S2:** Collection of suspicious Kratom samples used in this study

| **Sl. No.** | **Sample form** | **Place of collection**  **(Province)** | **Sample Code.** |
| --- | --- | --- | --- |
| 1 | Fresh leaves | Nakhon Si Thammarat | K-01 |
| 2 | Dried leaves | Nonthaburi | K-02 |
| 3 | Dried leaves | Nonthaburi | K-03 |
| 4 | Powders | Patthalung | K-04 |
| 5 | Juices | Satun | K-05 |
| 6 | Cocktails | Trang | K-06 |
